# Supplementary material for: Biocompatibility of cerium dioxide and silicon dioxide nanoparticles with endothelial cells
Source: PubMed Central journal article supplement (PMC4222402; doi:10.3762/bjnano.5.190), 2014-10-17
Supplement: Beilstein_J_Nanotechnol-05-1795-s001.pdf [file Beilstein_J_Nanotechnol-05-1795-s001.pdf]

# **Supporting Information**

for

## **Biocompatibility of cerium dioxide and silicon dioxide nanoparticles in endothelial cells**

Claudia Strobel<sup>1</sup>, Martin Förster<sup>2</sup> and Ingrid Hilger\*<sup>1</sup>

Address: <sup>1</sup>Department of Experimental Radiology, Institute of Diagnostic and Interventional Radiology I, Jena University Hospital – Friedrich Schiller University Jena, Erlanger Allee 101, 07747 Jena, Germany

<sup>2</sup>Department of Internal Medicine I, Division of Pulmonary Medicine and Allergy/Immunology, Jena University Hospital – Friedrich Schiller University Jena, Erlanger Allee 101, 07747 Jena, Germany

Email: Ingrid Hilger - [ingrid.hilger@med.uni-jena.de](mailto:ingrid.hilger@med.uni-jena.de)

\* Corresponding author

## **Additional experimental data**

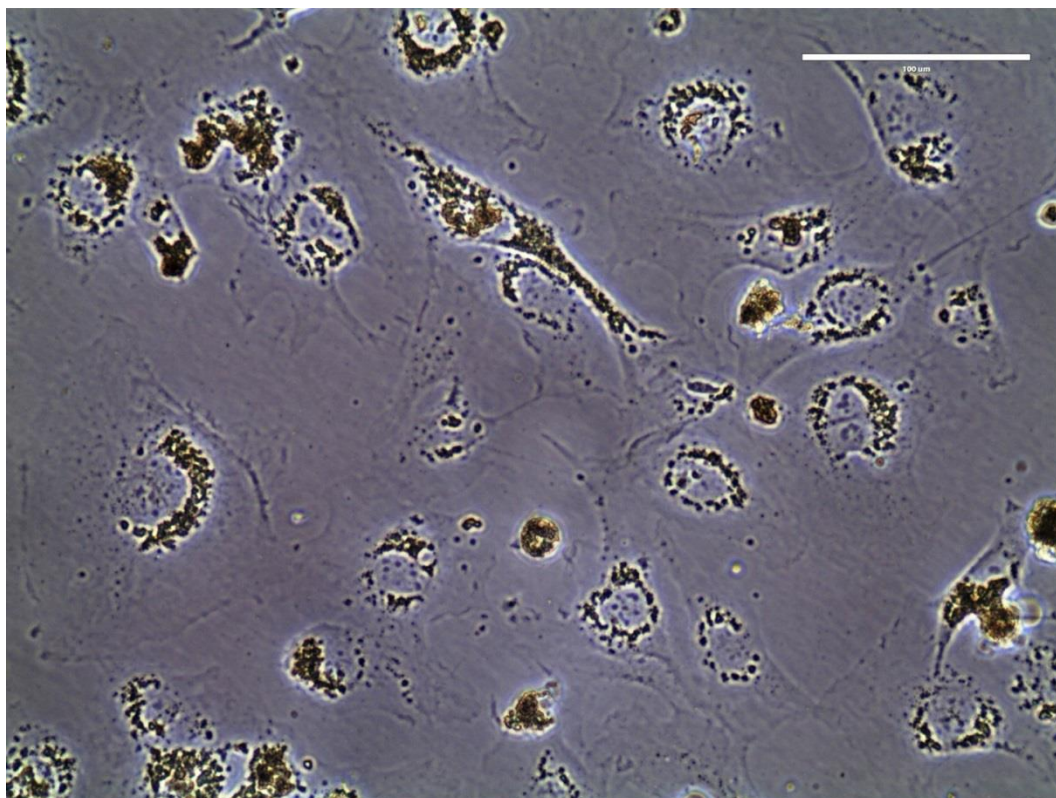

**Figure S1:** Light microscope image of HMEC-1 treated with 100 µg/mL CeO<sub>2</sub> nanoparticles (sample #B, no fluorescence label) confirms the peri-nuclear localization.

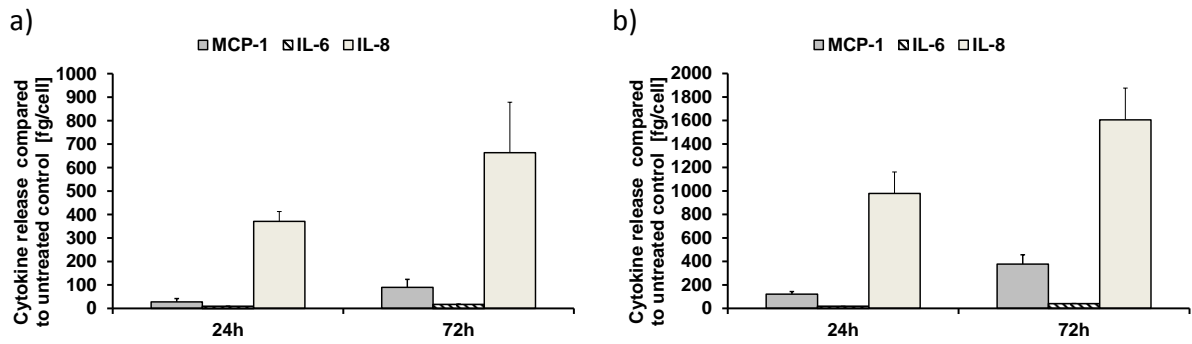

**Figure S2:** Cytokine release of HMEC-1 (a) and HUVEC (b) after treatment with the positive control IL-1 $\beta$  (c = 2000 pg/ml) at different incubation times (24 h; 72 h; n = 3 independent experiments).

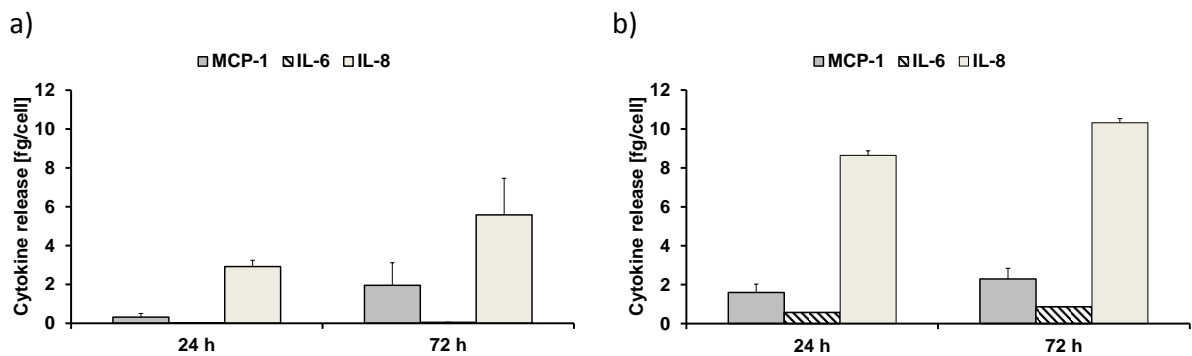

**Figure S3:** Cytokine release of untreated HMEC-1 (a) and HUVEC (b) at different incubation times (24 h; 72 h; n = 3 independent experiments).
